# Supplementary material for: Prevalence of Disability Among Older Adults in Prison
Source: PubMed Central journal article supplement (PMC11681372; doi:10.1001/jamanetworkopen.2024.52334), 2024-12-27
Supplement: jamanetwopen-e2452334-s002.pdf [file jamanetwopen-e2452334-s002.pdf]

## Data Sharing Statement

Miller. Prevalence of Disability Among Older Adults in Prison. *JAMA Netw Open*. Published December 27, 2024. doi:10.1001/jamanetworkopen.2024.52334

### Data

**Data available:** No

### Additional Information

**Explanation for why data not available:** Due to the terms of use, I am not able to share the source dataset. However, the data is publicly available and through GitHub I will provide a link to the data I used and will make available all code used to construct the analytic file and run all analyses.
